# Supplementary material for: Efficacy of Endoscopic Ultrasound-Guided Ablation with the HybridTherm Probe in Locally Advanced or Borderline Resectable Pancreatic Cancer: A Phase II Randomized Controlled Trial
Source: MDPI journal article supplement (doi:10.3390/cancers13184512), 2021-09-08
Supplement: s1 [file s1]

Article

# Efficacy of Endoscopic Ultrasound-Guided Ablation with the HybridTherm Probe in Locally Advanced or Borderline Resectable Pancreatic Cancer: A Phase II Randomized Controlled Trial

Sabrina Gloria Giulia Testoni, Maria Chiara Petrone, Michele Reni, Gemma Rossi, Maurizio Barbera, Valeria Nicoletti, Simone Gusmini, Gianpaolo Balzano, Walter Linzenbold, Markus Enderle, Emanuel Della-Torre, Francesco De Cobelli, Claudio Doglioni, Massimo Falconi, Gabriele Capurso and Paolo Giorgio Arcidiacono

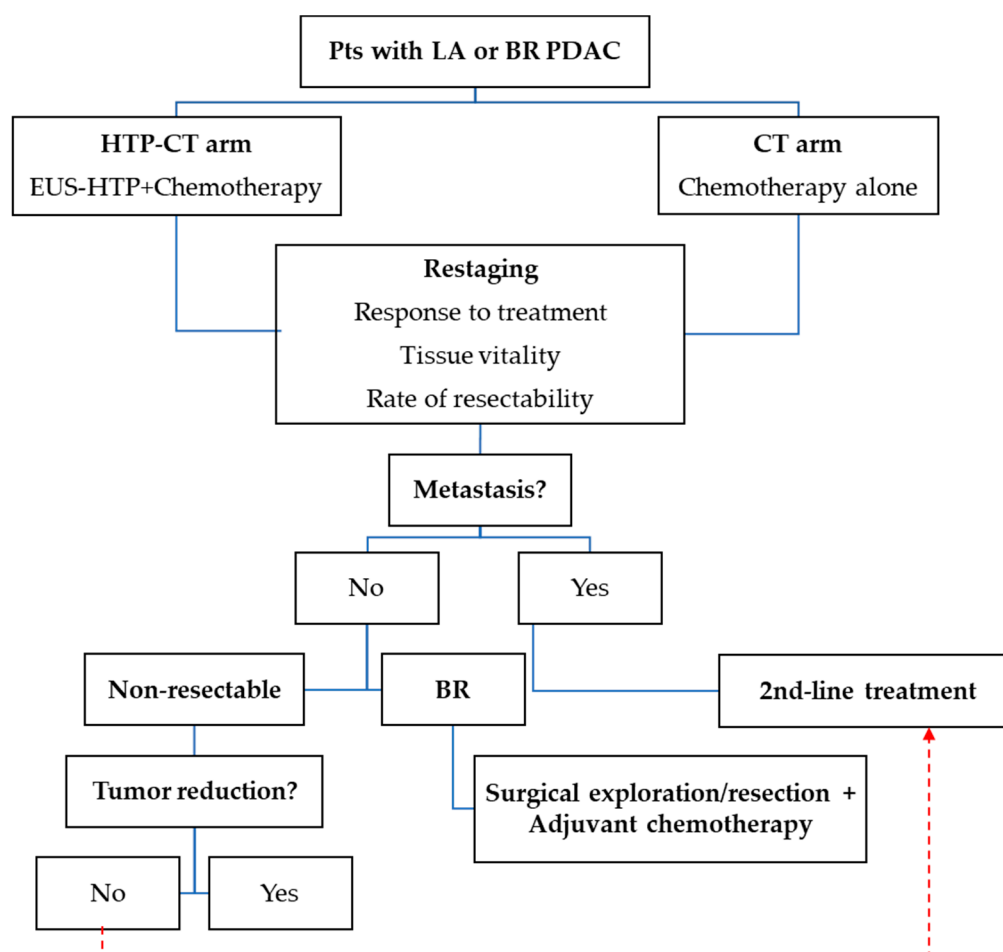

**Figure S1.** Flow-chart of the study design. LA: Locally advanced; BR: Borderline resectable; PDAC: pancreatic ductal adenocarcinoma; HTP-CT: HybridTherm Probe plus Chemotherapy; EUS-HTP: endoscopic ultrasound-guided ablation with HybridTherm Probe; CT: Chemotherapy.

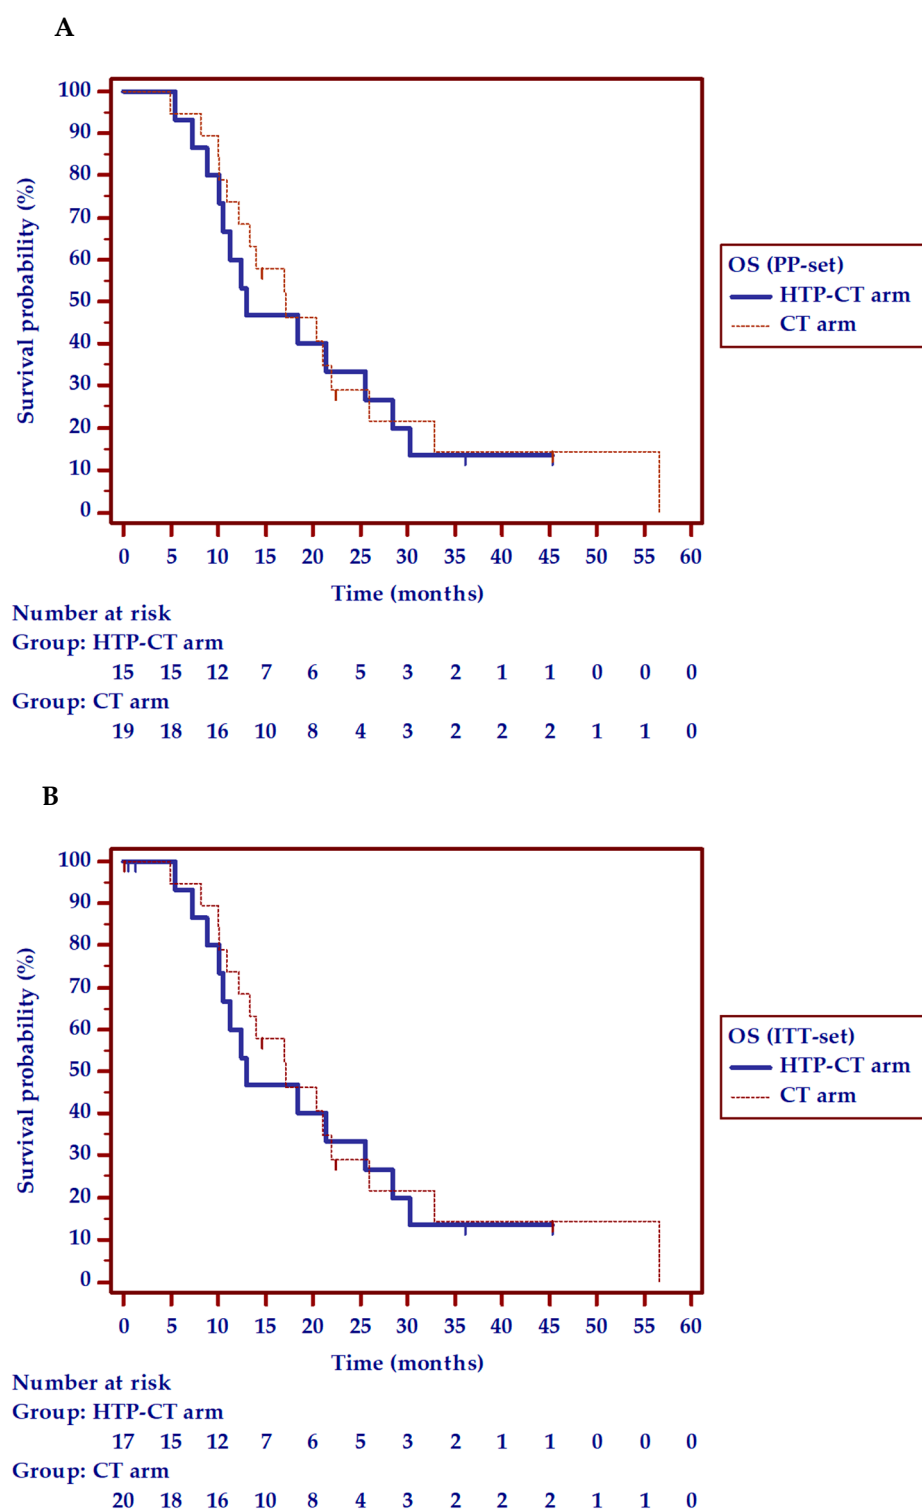

**Figure S2:** Median overall survival (OS) time (95% confidence interval) and hazard ratio (HR, 95% confidence interval) for death in patients treated with endoscopic ultrasound-guided ablation with HybridTherm Probe plus chemotherapy (HTP-CT arm) versus chemotherapy alone (CT arm): A) Per-Protocol analysis (PP-set): 13 (8.8 – 25.6) versus 17 (10.9 – 56.7) months; HR HTP-CT arm/CT arm for death = 1.18 (0.6 – 2.4) (Log-rank test: Chi-squared = 0.20,  $p = 0.79$ ); B) Intention-To-Treat analysis (ITT-set): 13 (8.8 – 25.6) versus 17 (10.9 – 56.7) months; HR HTP-CT arm/CT arm for death = 1.18 (0.6 – 2.4) (Log-rank test: Chi-squared = 0.20,  $p = 0.79$ ). Short vertical lines represent censored patients.

**Table S1.** Chemotherapy regimens, dosages and administration timing.

| CT regimens (AIOM)           | Drugs          | Dosage and administration timing                                                |
|------------------------------|----------------|---------------------------------------------------------------------------------|
| PEXG                         | Cisplatin      | 30 mg/m <sup>2</sup> on days 1 and 15                                           |
|                              | Epirubicin     | 30 mg/m <sup>2</sup> on days 1 and 15                                           |
|                              | Gemcitabine    | 800 mg/m <sup>2</sup> on days 1 and 15                                          |
|                              | Capecitabine   | 1250 mg/m <sup>2</sup> on days 1 to 28                                          |
| Gemcitabine                  | Gemcitabine    | 1000 mg/m <sup>2</sup> on days 1, 8, 15                                         |
| FOLFIRINOX                   | Oxaliplatin    | 85 mg/m <sup>2</sup> on days 1 and 15                                           |
|                              | Leucovorin     | 400 mg/m <sup>2</sup> on days 1 and 15                                          |
|                              | Irinotecan     | 180 mg/m <sup>2</sup> on days 1 and 15                                          |
|                              | Fluorouracil   | 400 mg/m <sup>2</sup> bolus followed by 2400 mg/m <sup>2</sup> on days 1 and 15 |
| Nab-Paclitaxel + Gemcitabine | Nab-paclitaxel | 125 mg/m <sup>2</sup> on days 1, 8, 15                                          |
|                              | Gemcitabine    | 1000 mg/m <sup>2</sup> on days 1, 8, 15                                         |

AIOM: Italian Association of Medical Oncology; CT: Chemotherapy.

**Table S2.** Chemotherapy-related features of the patients' cohort.

| Variables                                                       | HTP-CT arm    | CT arm         | p-value |
|-----------------------------------------------------------------|---------------|----------------|---------|
| Time between PDAC diagnosis and start of CT (days), mean ± StDe | 37.7 (± 11.7) | 32.8 (± 13.3)  | 0.27    |
| Time between randomization and start of CT (days), mean ± StDe  | 24.7 (± 12.2) | 22.2 (± 13.9)  | 0.58    |
| CT regimen, N. (%)                                              |               |                |         |
| Gemcitabine + Nab-Paclitaxel                                    | 13 (76.5)     | 13 (65)        | 0.45    |
| Folfinirox                                                      | 2 (11.8)      | 5 (25)         | 0.31    |
| Gemcitabine                                                     | 0             | 1 (5)          | 0.36    |
| CT duration (days), mean ± StDe                                 | 142.9 (± 49)  | 154.8 (± 56.2) | 0.53    |
| 6-months completed CT, N. (%)                                   | 12 (80)       | 12 (70.6)      | 0.55    |
| CT interruption before 6-months, N. (%)                         | 4 (26.7)      | 5 (29.4)       | 0.87    |
| Haematological toxicity, N.                                     | 1             | 0              |         |
| Extra-haematological toxicity, N.                               | 0             | 2              |         |
| Progression disease, N.                                         | 2             | 2              |         |
| Surgery before the end of 6-months CT, N.                       | 0             | 1              |         |
| Physician's choice, N.                                          | 1             | 0              |         |
| Chemo-radiotherapy after induction CT, N (%)                    | 10 (66.7)     | 11 (64.7)      | 0.90    |

PDAC: pancreatic ductal adenocarcinoma; HTP-CT: HybridTherm Probe plus Chemotherapy; CT: Chemotherapy; StDe: standard deviation; N: number.

**Table S3.** Pathological outcomes on surgical specimens in resected patients.

| Variables                                          | HTP-CT arm  | CT arm      |
|----------------------------------------------------|-------------|-------------|
| Resected patients % (N)                            |             |             |
| PP-set                                             | 2/15 (13.3) | 4/17 (23.5) |
| ITT-set                                            | 2/17 (11.8) | 4/20 (20)   |
| R status % (N)                                     | 2/2 (100)   | 3/4 (75)    |
| R0 resection rate                                  | 0           | 1/4 (25)    |
| Type of resection, N (%)                           |             |             |
| Pancreaticoduodenectomy                            | 1/2 (50)    | 3/4 (75)    |
| Distal pancreatectomy                              | 1/2 (50)    | 0           |
| Total pancreatectomy                               | 0           | 1/4 (25)    |
| TNM 7th classification [11]                        |             |             |
| T code, N (%)                                      |             |             |
| pT2                                                | -           | -           |
| pT3                                                | 1/2 (50)    | 1/4 (25)    |
| N status, N (%)                                    |             |             |
| pN0                                                | -           | 1/4 (25)    |
| pN1                                                | 1/2 (50)    | -           |
| pN2                                                | -           | -           |
| Grade, N (%)                                       |             |             |
| G2                                                 | 1/2 (50)    | 1/4 (25)    |
| G3                                                 | -           | -           |
| TNM 8th classification [11]                        |             |             |
| T code, N (%)                                      |             |             |
| pT2                                                | 1/2 (50)    | 2/4 (50)    |
| pT3                                                | -           | 1/4 (25)    |
| N status, N (%)                                    |             |             |
| pN0                                                | 1/2 (50)    | -           |
| pN1                                                | -           | 1/4 (25)    |
| pN2                                                | -           | 2/4 (50)    |
| Grade, N (%)                                       |             |             |
| G2                                                 | -           | 1/4 (25)    |
| G3                                                 | 1/2 (50)    | 2/4 (50)    |
| Pathological response (Hartman et al.) [23], N (%) |             |             |
| Marked-Complete                                    | 0           | 1/4 (25)    |
| Minimum-Moderate                                   | 2/2 (100)   | 1/4 (25)    |
| Poor                                               | 0           | 2/4 (50)    |

HTP-CT: HybridTherm Probe plus Chemotherapy; CT: Chemotherapy; N: number; PP: per-protocol; ITT: intention-to-treat; TNM: tumour-node-metastasis.

**Table S4.** Chemotherapy-related grade III/IV adverse events, defined according to the National Cancer Institute's Common Terminology Criteria for Adverse Events (version 4.0). The worst toxicity grade in every cycle for each adverse event type was considered.

| Reasons for chemotherapy interruption | HTP-CT arm  |             | CT arm      |           | p-value |         |
|---------------------------------------|-------------|-------------|-------------|-----------|---------|---------|
|                                       | PP-set      | ITT-set     | PP-set      | ITT-set   | PP-set  | ITT-set |
| Anemia, N (%)                         |             |             |             |           |         |         |
| Grade III                             | 3/15 (20)   | 3/17 (17.6) | 2/17 (11.8) | 2/20 (10) | 0.53    | 0.51    |
| Grade IV                              | 0           | 0           | 0           | 0         |         |         |
| Neutropenia, N (%)                    |             |             |             |           |         |         |
| Grade III                             | 2/15 (13.3) | 2/17 (11.8) | 3/17 (17.6) | 3/20 (15) | 0.74    | 0.78    |
| Grade IV                              | 1/15 (6.7)  | 1/17 (5.9)  | 3/17 (17.6) | 3/20 (15) | 0.36    | 0.38    |
| Thrombocytopenia, N (%)               |             |             |             |           |         |         |
| Grade III                             | 1/15 (6.7)  | 1/17 (5.9)  | 1/17 (5.9)  | 1/20 (5)  | 0.93    | 0.90    |
| Grade IV                              | 1/15 (6.7)  | 1/17 (5.9)  | 0           | 0         | 0.28    | 0.28    |
| Nausea, N (%)                         |             |             |             |           |         |         |
| Grade III                             | 1/15 (6.7)  | 1/17 (5.9)  | 3/17 (17.6) | 3/20 (15) | 0.36    | 0.38    |
| Grade IV                              | 0           | 0           | 0           | 0         |         |         |
| Diarrhea, N (%)                       |             |             |             |           |         |         |
| Grade III                             | 1/15 (6.7)  | 1/17 (5.9)  | 1/17 (5.9)  | 1/20 (5)  | 0.93    | 0.90    |
| Grade IV                              | 0           | 0           | 0           | 0         |         |         |
| Mucositis, N (%)                      |             |             |             |           |         |         |
| Grade III                             | 1/15 (6.7)  | 1/17 (5.9)  | 0           | 0         | 0.28    | 0.28    |
| Grade IV                              | 0           | 0           | 0           | 0         |         |         |
| Fatigue, N (%)                        |             |             |             |           |         |         |
| Grade III                             | 0           | 0           | 3/17 (17.6) | 3/20 (15) | 0.09    | 0.10    |
| Grade IV                              | 0           | 0           | 0           | 0         |         |         |
| Neuropathy, N (%)                     |             |             |             |           |         |         |
| Grade III                             | 2/15 (13.3) | 2/17 (11.8) | 4/17 (23.5) | 4/20 (20) | 0.47    | 0.51    |
| Grade IV                              | 0           | 0           | 0           | 0         |         |         |
| Fever, N (%)                          |             |             |             |           |         |         |
| Grade III                             | 2/15 (13.3) | 2/17 (11.8) | 2/17 (11.8) | 2/20 (10) | 0.90    | 0.86    |
| Grade IV                              | 0           | 0           | 0           | 0         |         |         |
| Cholangitis, N (%)                    |             |             |             |           |         |         |
| Grade III                             | 1/15 (6.7)  | 1/17 (5.9)  | 1/17 (5.9)  | 1/20 (5)  | 0.93    | 0.90    |
| Grade IV                              | 0           | 0           | 0           | 0         |         |         |

HTP-CT: HybridTherm Probe plus Chemotherapy; CT: Chemotherapy; N: number.
